# Supplementary material for: Grape Small Auxin Upregulated RNA (SAUR) 041 Is a Candidate Regulator of Berry Size in Grape
Source: MDPI journal article supplement (doi:10.3390/ijms222111818), 2021-10-30
Supplement: s1 [file s1]

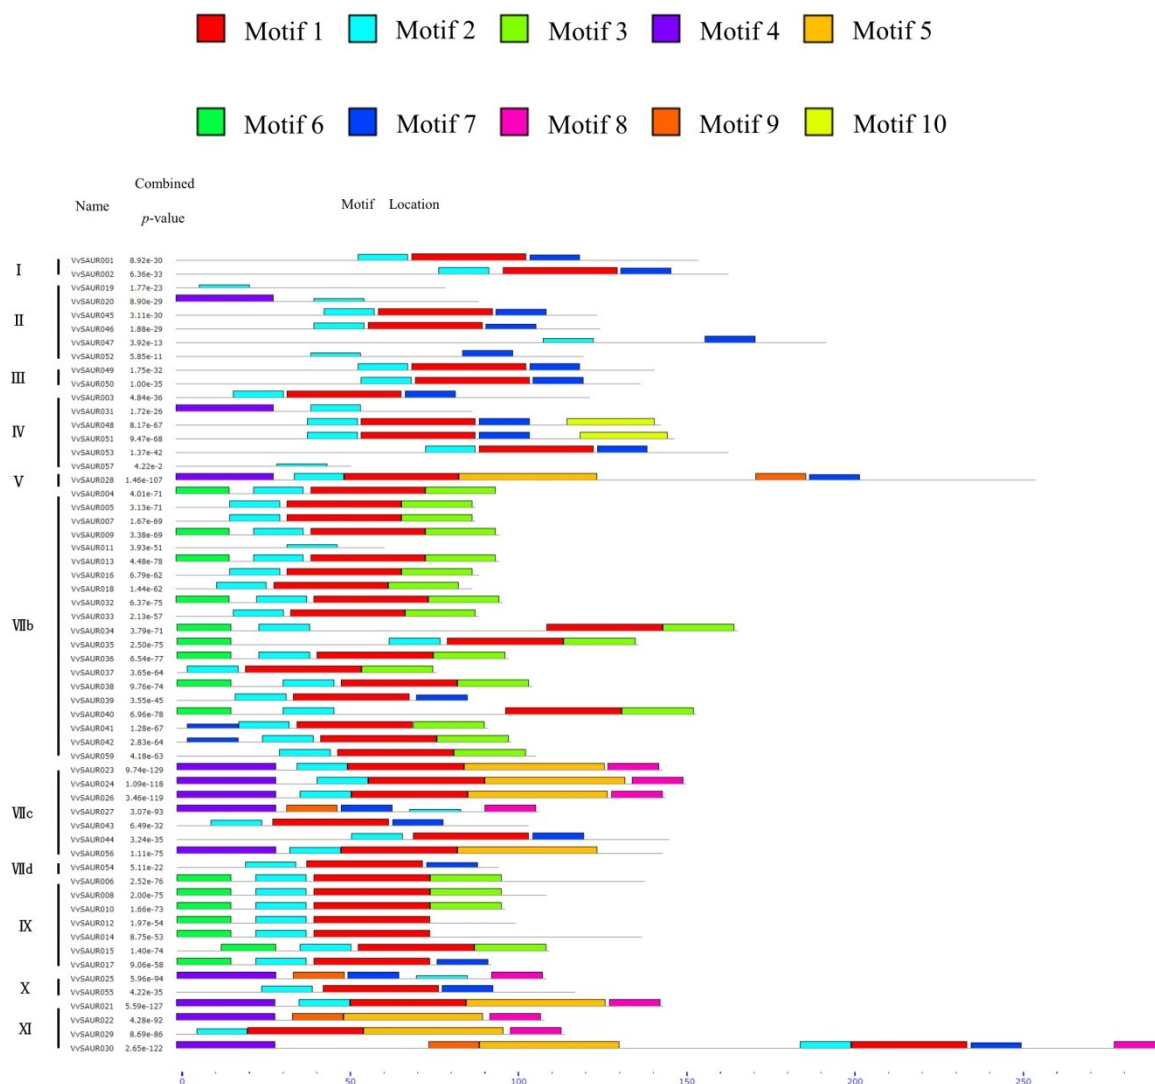

**Figure S1.** The conservative motif analysis of the *VvSAUR* family. The distribution of motifs in the *VvSAUR* family is represented by rectangles of different colors.

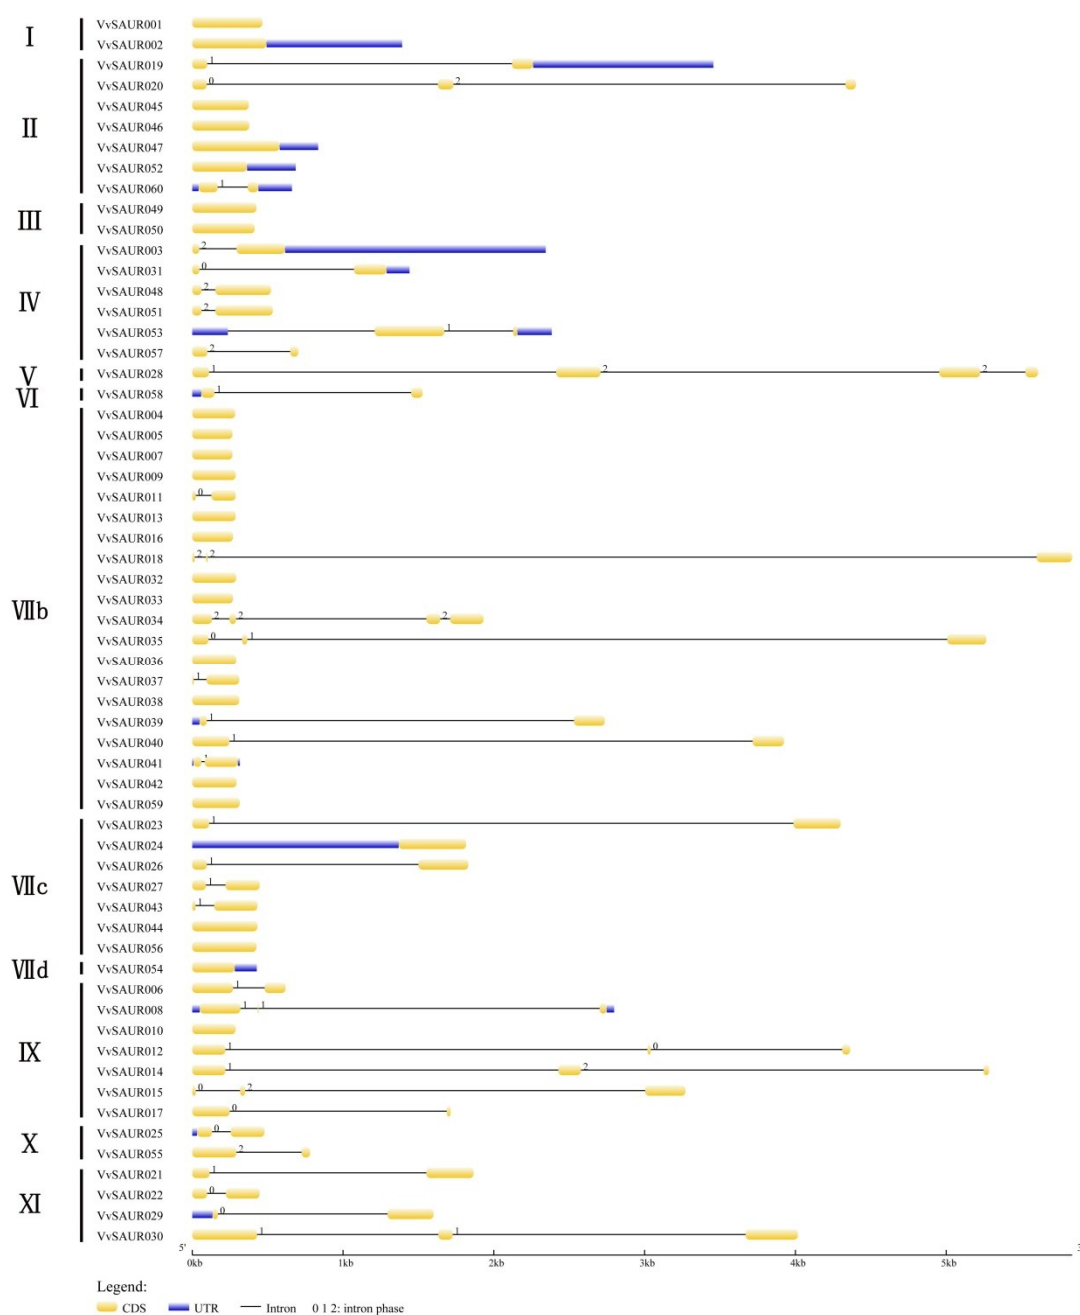

**Figure S2.** The structural features of the *VvSAUR* family. The blue rectangles represent untranslated regions (UTRs). The yellow round-cornered rectangles represent exons. The black lines represent introns. The number above the lines represents the intron phase.

**Table S1.** Details of the *VvSAUR* family. The gene locus is available in the National Center for Biotechnology Information Database. Mw, molecular weight; PI, isoelectric point.

| Gene locus            | Gene symbol   | ORF length(bp) | No. of aa | Mw       | PI    | Chr. | Location              | Orientation | Group |
|-----------------------|---------------|----------------|-----------|----------|-------|------|-----------------------|-------------|-------|
| GSVIVG01<br>000929001 | VvSAUR00<br>1 | 465            | 155       | 17397.04 | 9.62  | 1    | 22022632-<br>22023096 | forward     | I     |
| GSVIVG01<br>001263001 | VvSAUR00<br>2 | 492            | 164       | 19012.29 | 10.62 | 2    | 4821803-<br>4823194   | reverse     | I     |
| GSVIVG01<br>024152001 | VvSAUR00<br>3 | 369            | 123       | 13585.51 | 5.61  | 3    | 736293-<br>738636     | forward     | IV    |
| GSVIVG01<br>024138001 | VvSAUR00<br>4 | 285            | 95        | 10554.18 | 6.56  | 3    | 858886-<br>859170     | reverse     | VIIb  |
| GSVIVG01<br>024136001 | VvSAUR00<br>5 | 267            | 89        | 9522.85  | 5.71  | 3    | 864608-<br>864874     | forward     | VIIb  |
| GSVIVG01<br>024135001 | VvSAUR00<br>6 | 411            | 137       | 15518.07 | 8.88  | 3    | 866406-<br>867024     | forward     | IX    |
| GSVIVG01<br>024134001 | VvSAUR00<br>7 | 267            | 89        | 9536.88  | 5.71  | 3    | 867890-<br>868156     | forward     | VIIb  |
| GSVIVG01<br>024133001 | VvSAUR00<br>8 | 324            | 108       | 12260.50 | 8.91  | 3    | 869578-<br>872375     | forward     | IX    |
| GSVIVG01<br>024131001 | VvSAUR00<br>9 | 288            | 96        | 10559.18 | 6.82  | 3    | 883689-<br>883976     | reverse     | VIIb  |
| GSVIVG01<br>024130001 | VvSAUR01<br>0 | 288            | 96        | 10767.51 | 6.95  | 3    | 885397-<br>885684     | reverse     | IX    |
| GSVIVG01<br>024129001 | VvSAUR01<br>1 | 186            | 62        | 6807.89  | 4.70  | 3    | 888666-<br>888953     | forward     | VIIb  |
| GSVIVG01<br>024128001 | VvSAUR01<br>2 | 297            | 99        | 11306.30 | 9.63  | 3    | 890779-<br>895141     | reverse     | IX    |
| GSVIVG01<br>024127001 | VvSAUR01<br>3 | 288            | 96        | 10496.09 | 6.55  | 3    | 897891-<br>898178     | forward     | VIIb  |
| GSVIVG01<br>024126001 | VvSAUR01<br>4 | 408            | 136       | 15613.93 | 9.22  | 3    | 898286-<br>903569     | reverse     | IX    |
| GSVIVG01<br>024125001 | VvSAUR01<br>5 | 327            | 109       | 11939.88 | 6.89  | 3    | 905892-<br>909162     | forward     | IX    |
| GSVIVG01<br>024123001 | VvSAUR01<br>6 | 270            | 90        | 9743.06  | 4.97  | 3    | 915230-<br>915499     | reverse     | VIIb  |
| GSVIVG01<br>024122001 | VvSAUR01<br>7 | 276            | 92        | 10479.22 | 9.51  | 3    | 915998-<br>917711     | reverse     | IX    |
| GSVIVG01<br>024120001 | VvSAUR01<br>8 | 264            | 88        | 9643.04  | 5.60  | 3    | 922119-<br>927953     | forward     | VIIb  |
| GSVIVG01<br>023917001 | VvSAUR01<br>9 | 240            | 80        | 9292.95  | 11.33 | 3    | 2502521-<br>2505976   | forward     | II    |
| GSVIVG01<br>023916001 | VvSAUR02<br>0 | 270            | 90        | 10507.66 | 12.02 | 3    | 2508656-<br>2513056   | forward     | II    |
| GSVIVG01<br>023915001 | VvSAUR02<br>1 | 429            | 143       | 16365.33 | 9.27  | 3    | 2513557-<br>2515422   | forward     | XI    |
| GSVIVG01<br>023913001 | VvSAUR02<br>2 | 324            | 108       | 12236.35 | 8.68  | 3    | 2518586-<br>2519032   | forward     | XI    |
| GSVIVG01<br>023912001 | VvSAUR02<br>3 | 426            | 142       | 16204.15 | 9.65  | 3    | 2520298-<br>2524597   | forward     | VIIc  |
| GSVIVG01<br>023911001 | VvSAUR02<br>4 | 447            | 149       | 17029.75 | 9.03  | 3    | 2525431-<br>2527246   | reverse     | VIIc  |
| GSVIVG01<br>023910001 | VvSAUR02<br>5 | 324            | 108       | 12071.35 | 9.62  | 3    | 2528389-<br>2528867   | forward     | X     |
| GSVIVG01<br>023909001 | VvSAUR02<br>6 | 429            | 143       | 16236.16 | 9.35  | 3    | 2530531-<br>2532361   | forward     | VIIc  |
| GSVIVG01<br>023908001 | VvSAUR02<br>7 | 318            | 106       | 12068.19 | 9.51  | 3    | 2533266-<br>2533712   | reverse     | VIIc  |

|                       |               |     |     |          |       |    |                       |         |       |
|-----------------------|---------------|-----|-----|----------|-------|----|-----------------------|---------|-------|
| GSVIVG01<br>023907001 | VvSAUR02<br>8 | 765 | 255 | 28965.02 | 9.41  | 3  | 2536206-<br>2541814   | forward | V     |
| GSVIVG01<br>023881001 | VvSAUR02<br>9 | 342 | 114 | 12891.88 | 5.48  | 3  | 2749512-<br>2751111   | reverse | XI    |
| GSVIVG01<br>023880001 | VvSAUR03<br>0 | 873 | 291 | 32880.35 | 5.63  | 3  | 2751841-<br>2755856   | reverse | XI    |
| GSVIVG01<br>023879001 | VvSAUR03<br>1 | 264 | 88  | 9888.54  | 10.23 | 3  | 2757523-<br>2758963   | forward | IV    |
| GSVIVG01<br>019106001 | VvSAUR03<br>2 | 291 | 97  | 10860.46 | 7.82  | 4  | 16733927-<br>16734217 | reverse | VIIb  |
| GSVIVG01<br>019105001 | VvSAUR03<br>3 | 270 | 90  | 9990.55  | 8.64  | 4  | 16735502-<br>16735771 | reverse | VIIb  |
| GSVIVG01<br>019103001 | VvSAUR03<br>4 | 492 | 164 | 18532.53 | 8.54  | 4  | 16738840-<br>16740771 | reverse | VIIb  |
| GSVIVG01<br>019101001 | VvSAUR03<br>5 | 405 | 135 | 15287.92 | 9.67  | 4  | 16744811-<br>16750076 | reverse | VIIb  |
| GSVIVG01<br>019099001 | VvSAUR03<br>6 | 291 | 97  | 10809.53 | 7.84  | 4  | 16755874-<br>16756164 | reverse | VIIb  |
| GSVIVG01<br>019097001 | VvSAUR03<br>7 | 228 | 76  | 8361.52  | 6.26  | 4  | 16763888-<br>16764199 | reverse | VIIb  |
| GSVIVG01<br>019096001 | VvSAUR03<br>8 | 312 | 104 | 11472.27 | 9.25  | 4  | 16765755-<br>16766066 | reverse | VIIb  |
| GSVIVG01<br>019095001 | VvSAUR03<br>9 | 255 | 85  | 9441.86  | 7.95  | 4  | 16767618-<br>16770353 | reverse | VIIb  |
| GSVIVG01<br>019094001 | VvSAUR04<br>0 | 456 | 152 | 16871.48 | 8.89  | 4  | 16772358-<br>16776281 | reverse | VIIb  |
| GSVIVG01<br>019093001 | VvSAUR04<br>1 | 273 | 91  | 10019.53 | 6.25  | 4  | 16779757-<br>16780072 | reverse | VIIb  |
| GSVIVG01<br>019092001 | VvSAUR04<br>2 | 294 | 98  | 10962.60 | 6.16  | 4  | 16782060-<br>16782353 | reverse | VIIb  |
| GSVIVG01<br>031508001 | VvSAUR04<br>3 | 309 | 103 | 11635.28 | 5.76  | 6  | 17809104-<br>17809535 | forward | VIIc  |
| GSVIVG01<br>031507001 | VvSAUR04<br>4 | 432 | 144 | 16135.55 | 6.83  | 6  | 17828336-<br>17828767 | forward | VIIc  |
| GSVIVG01<br>025708001 | VvSAUR04<br>5 | 375 | 125 | 14244.64 | 8.84  | 8  | 12797230-<br>12797604 | forward | II    |
| GSVIVG01<br>033868001 | VvSAUR04<br>6 | 378 | 126 | 13881.91 | 6.29  | 8  | 17142119-<br>17142496 | reverse | II    |
| GSVIVG01<br>016698001 | VvSAUR04<br>7 | 579 | 193 | 21144.01 | 6.21  | 9  | 445796-<br>446630     | forward | II    |
| GSVIVG01<br>029567001 | VvSAUR04<br>8 | 432 | 144 | 16284.00 | 6.10  | 9  | 21457323-<br>21457844 | forward | IV    |
| GSVIVG01<br>029566001 | VvSAUR04<br>9 | 426 | 142 | 16737.43 | 9.37  | 9  | 21482997-<br>21483422 | reverse | III   |
| GSVIVG01<br>029559001 | VvSAUR05<br>0 | 414 | 138 | 16094.85 | 9.30  | 9  | 21569331-<br>21569744 | forward | III   |
| GSVIVG01<br>029558001 | VvSAUR05<br>1 | 444 | 148 | 16771.60 | 6.43  | 9  | 21572109-<br>21572642 | reverse | IV    |
| GSVIVG01<br>015021001 | VvSAUR05<br>2 | 363 | 121 | 13265.03 | 5.60  | 11 | 516935-<br>517620     | forward | II    |
| GSVIVG01<br>015023001 | VvSAUR05<br>3 | 492 | 164 | 18227.53 | 5.22  | 11 | 528067-<br>530450     | reverse | IV    |
| GSVIVG01<br>020838001 | VvSAUR05<br>4 | 282 | 94  | 10594.48 | 9.23  | 12 | 1253357-<br>1253784   | reverse | VIIId |
| GSVIVG01<br>038622001 | VvSAUR05<br>5 | 351 | 117 | 13282.46 | 6.06  | 16 | 21394851-<br>21395632 | reverse | X     |
| GSVIVG01<br>008695001 | VvSAUR05<br>6 | 426 | 142 | 15802.62 | 9.83  | 18 | 1262260-<br>1262685   | forward | VIIc  |

|                                  |     |     |          |       |    |                       |         |      |
|----------------------------------|-----|-----|----------|-------|----|-----------------------|---------|------|
| GSVIVG01 VvSAUR05<br>009870001 7 | 156 | 52  | 6102.37  | 11.79 | 18 | 11959701-<br>11960404 | forward | IV   |
| GSVIVG01 VvSAUR05<br>009872001 8 | 165 | 55  | 5987.21  | 10.31 | 18 | 11986451-<br>11987978 | reverse | VI   |
| GSVIVG01 VvSAUR05<br>009875001 9 | 315 | 105 | 11720.72 | 8.85  | 18 | 12002966-<br>12003280 | forward | VIIb |
| GSVIVG01 VvSAUR06<br>036807001 0 | 198 | 66  | 7502.57  | 10.03 | 19 | 22279115-<br>22279775 | forward | II   |

**Table S2.** Normal expression sequences of 10 motifs identified. Sites represent the time of motif appeared.

| Motif   | Sequences                                                                                                                                                                                 | Sites | Length(aa) |
|---------|-------------------------------------------------------------------------------------------------------------------------------------------------------------------------------------------|-------|------------|
| Motif1  | [KR][KR]RF[VM][VI]P[IL][S<br>VE]YL[NKS][HN][PN][SI]F[Q<br>R][NEKA]L[LF][SER][QME][<br>AS]EEE[FY]GF[DNQ][HQS][P<br>E][GM][GP]                                                              | 48    | 34         |
| Motif2  | [PTSA][ASKT][NDVE][VA][P<br>D]KG[HY][FLV][AVP]VYVG[<br>ED]                                                                                                                                | 57    | 15         |
| Motif3  | GLTIPC[KTREN]E[ED][AT]F[<br>IL][DN][LV][TA][SC][RSQ]L[<br>NQS][ASC]S                                                                                                                      | 22    | 21         |
| Motif4  | MI[SN][PA]KKLI[KR]MAR[K<br>EN]WQ[KR][MY]AA[ILM][R<br>GK]RKRI[SI][LS][PQ]R                                                                                                                 | 12    | 29         |
| Motif5  | I[TI]LP[CYF]D[SAL][VFA][F<br>T][ML][EDQ]Y[IAVM][IVL][<br>PSF][LFM][IV][QG][RQ][GH][<br>VM][AS][KE][DE][LIVM]E[K<br>R]AL[LI][MFVTI]<br>S[ILV][AVG][TYS][STD][RN<br>TQC][CS][SL][SLQC][SLF] | 9     | 41         |
| Motif6  | M[GAS][IFN][RHA][LF][PQD<br>][SRGL][IMV][IVLG][PQN]A<br>K[QK][IVF][LVPF][RKQ]                                                                                                             | 16    | 16         |
| Motif7  | [TKVQ][ILV]P[CS][EDRV][V<br>EISP][EVST][EFV][FMLIA][E<br>KRQ][YKER][IVL][LY][KSG]<br>[LMEV]                                                                                               | 24    | 15         |
| Motif8  | [SFI][HQC]Q[EG][QH][MTSN<br>I][NGS][ESQH][QRP]LL[LVF]<br>C[ASGR][YFC]                                                                                                                     | 9     | 15         |
| Motif9  | F[KQE]MSEEE[FY]G[LI][PQ]<br>[SR][DTN]GP                                                                                                                                                   | 5     | 15         |
| Motif10 | NAEKEMIGCCSSSDCELT-<br>PSHHPQMC                                                                                                                                                           | 2     | 26         |

**Table S3.** The orthologous *SAUR* genes in grape, *Arabidopsis* and tomato genome.

| <b>SAUR Name1</b> | <b>SAUR Name2</b> |
|-------------------|-------------------|
| VvSAUR002         | AtSAUR045         |
| VvSAUR003         | AtSAUR004         |
| VvSAUR003         | AtSAUR018         |
| VvSAUR003         | AtSAUR067         |
| VvSAUR021         | AtSAUR006         |
| VvSAUR021         | AtSAUR007         |
| VvSAUR021         | AtSAUR008         |
| VvSAUR021         | AtSAUR009         |
| VvSAUR021         | AtSAUR012         |
| VvSAUR021         | AtSAUR013         |
| VvSAUR021         | AtSAUR076         |
| VvSAUR023         | AtSAUR006         |
| VvSAUR023         | AtSAUR007         |
| VvSAUR023         | AtSAUR008         |
| VvSAUR023         | AtSAUR009         |
| VvSAUR023         | AtSAUR012         |
| VvSAUR023         | AtSAUR013         |
| VvSAUR023         | AtSAUR076         |
| VvSAUR032         | AtSAUR059         |
| VvSAUR033         | AtSAUR059         |
| VvSAUR036         | AtSAUR059         |
| VvSAUR037         | AtSAUR068         |
| VvSAUR037         | AtSAUR069         |
| VvSAUR037         | AtSAUR070         |
| VvSAUR037         | AtSAUR071         |
| VvSAUR037         | AtSAUR072         |
| VvSAUR037         | AtSAUR073         |
| VvSAUR039         | AtSAUR023         |
| VvSAUR041         | AtSAUR058         |
| VvSAUR043         | AtSAUR027         |
| VvSAUR044         | AtSAUR027         |
| VvSAUR045         | AtSAUR030         |
| VvSAUR046         | AtSAUR029         |
| VvSAUR048         | AtSAUR026         |
| VvSAUR049         | AtSAUR041         |
| VvSAUR050         | AtSAUR041         |
| VvSAUR051         | AtSAUR026         |
| VvSAUR052         | AtSAUR002         |
| VvSAUR052         | AtSAUR075         |
| VvSAUR053         | AtSAUR042         |
| VvSAUR055         | AtSAUR032         |
| VvSAUR001         | SISAUR062         |
| VvSAUR002         | SISAUR071         |
| VvSAUR003         | SISAUR003         |
| VvSAUR018         | SISAUR101         |
| VvSAUR021         | SISAUR047         |
| VvSAUR024         | SISAUR044         |
| VvSAUR036         | SISAUR084         |
| VvSAUR041         | SISAUR028         |
| VvSAUR043         | SISAUR063         |
| VvSAUR044         | SISAUR063         |
| VvSAUR045         | SISAUR072         |
| VvSAUR046         | SISAUR086         |
| VvSAUR048         | SISAUR041         |
| VvSAUR051         | SISAUR041         |

|           |           |
|-----------|-----------|
| VvSAUR052 | SISAUR066 |
| VvSAUR053 | SISAUR065 |
| VvSAUR054 | SISAUR067 |
| VvSAUR055 | SISAUR036 |

**Table S4.** The paralogous *SAUR* genes in grape and *Arabidopsis* genome.

| <b>SAUR Name1</b> | <b>SAUR Name2</b> |
|-------------------|-------------------|
| AtSAUR002         | AtSAUR075         |
| AtSAUR004         | AtSAUR018         |
| AtSAUR004         | AtSAUR067         |
| AtSAUR006         | AtSAUR007         |
| AtSAUR006         | AtSAUR008         |
| AtSAUR006         | AtSAUR009         |
| AtSAUR006         | AtSAUR012         |
| AtSAUR006         | AtSAUR013         |
| AtSAUR006         | AtSAUR076         |
| AtSAUR007         | AtSAUR008         |
| AtSAUR007         | AtSAUR009         |
| AtSAUR007         | AtSAUR012         |
| AtSAUR007         | AtSAUR013         |
| AtSAUR007         | AtSAUR076         |
| AtSAUR008         | AtSAUR009         |
| AtSAUR008         | AtSAUR012         |
| AtSAUR008         | AtSAUR013         |
| AtSAUR008         | AtSAUR076         |
| AtSAUR009         | AtSAUR012         |
| AtSAUR009         | AtSAUR013         |
| AtSAUR009         | AtSAUR076         |
| AtSAUR012         | AtSAUR013         |
| AtSAUR012         | AtSAUR076         |
| AtSAUR013         | AtSAUR076         |
| AtSAUR018         | AtSAUR067         |
| AtSAUR068         | AtSAUR069         |
| AtSAUR068         | AtSAUR070         |
| AtSAUR068         | AtSAUR071         |
| AtSAUR068         | AtSAUR072         |
| AtSAUR068         | AtSAUR073         |
| AtSAUR069         | AtSAUR070         |
| AtSAUR069         | AtSAUR071         |
| AtSAUR069         | AtSAUR072         |
| AtSAUR069         | AtSAUR073         |
| AtSAUR070         | AtSAUR071         |
| AtSAUR070         | AtSAUR072         |
| AtSAUR070         | AtSAUR073         |
| AtSAUR071         | AtSAUR072         |
| AtSAUR071         | AtSAUR073         |
| AtSAUR072         | AtSAUR073         |
| VvSAUR021         | VvSAUR023         |
| VvSAUR032         | VvSAUR033         |
| VvSAUR032         | VvSAUR036         |
| VvSAUR033         | VvSAUR036         |
| VvSAUR043         | VvSAUR044         |
| VvSAUR048         | VvSAUR051         |
| VvSAUR049         | VvSAUR050         |

**Table S5.** List of primers used for qRT-PCR and construction of recombinant plasmid.

| Gene name               | Gene identifier   | Forward primer (5'-3')           | Reverse primer (5'-3')           |
|-------------------------|-------------------|----------------------------------|----------------------------------|
| VvSAUR041-pB221-GFP     | GSVIVG01019093001 | TCTAGAATGGG-<br>TATTCGTTTGCCCTCA | GTCGACTTATGAGGCAC-<br>TCAATTGAGA |
| VvSAUR041-3301          | GSVIVG01019093001 | CCATGGATGGG-<br>TATTCGTTTGCCCTCA | AGATCTTTATGAGGCAC-<br>TCAATTGAGA |
| VvSAUR041-pART-CAM-EGFP | GSVIVG01019093001 | CTCGAGATGGG-<br>TATTCGTTTGCCCTCA | GAATTCTTATGAGGCAC-<br>TCAATTGAGA |
| VvSAUR041-qRT           | GSVIVG01019093001 | GCAG-<br>TCTGTCCATATTAGAAG       | GTTAGACCACCCA-<br>TAGAATGA       |
| SlActin                 | Q96483            | TGTCCCTATCTAC-<br>GAGGGTTATGC    | AGTTAAATCACGACCAG-<br>CAAGAT     |
| AtUBQ3                  | AT5G03240         | CGGAAAGAC-<br>CATTACTCTGGA       | CAAGTGTGCGAC-<br>CATCCTCAA       |
